# Supplementary material
Source: MDPI journal article supplement (https://www.mdpi.com/2504-2289/7/2/79)
Supplement: s1 [file s1]

Archive with 1 entries (1 files):
- BDCC-2225544-supplementary.pdf
